# Supplementary material for: Synthesis of size-controlled PtPdIr nanoparticles by solution plasma sputtering and their catalytic properties
Source: Royal Society of Chemistry journal article supplement (doi:10.1039/d5ra01747e), 2025-01-01
Supplement: d5ra01747e1.pdf [file d5ra01747e1.pdf]

## Supporting Information

### **Synthesis of size-controlled PtPdIr nanoparticles by solution plasma sputtering and their catalytic properties**

Yuanyuan Liu,<sup>a</sup> Zhunda Zhu,<sup>a</sup> Zhuoya Deng,<sup>a</sup> Pengfei Wang,<sup>a</sup> Sangwoo Chae,<sup>b</sup> Yasuyuki

Sawada,<sup>a,b</sup> and Nagahiro Saito<sup>a,b,c,d\*</sup>

<sup>a</sup>Department of Chemical Systems Engineering, Graduate School of Engineering, Nagoya University, Furo-cho, Chikusa-ku, Nagoya 464-8603, Japan;

<sup>b</sup>Institute of Innovation for Future Society, Nagoya University, Furo-cho, Chikusa-ku, Nagoya 464-8603, Japan;

<sup>c</sup>Department of International Collaborative Program in Sustainable Materials and Technology for Industries between Nagoya University and Chulalongkorn University, Graduate School of Engineering, Nagoya University, Furo-cho, Chikusa-ku, Nagoya 464-8603, Japan;

<sup>d</sup>Conjoint Research Laboratory in Nagoya University, Shinshu University, Furo-cho, Chikusa-ku, Nagoya 464-8603, Japan.

\*Corresponding Author: Nagahiro Saito: E-mail: [saito.nagahiro.z7@f.mail.nagoya-u.ac.jp](mailto:saito.nagahiro.z7@f.mail.nagoya-u.ac.jp)

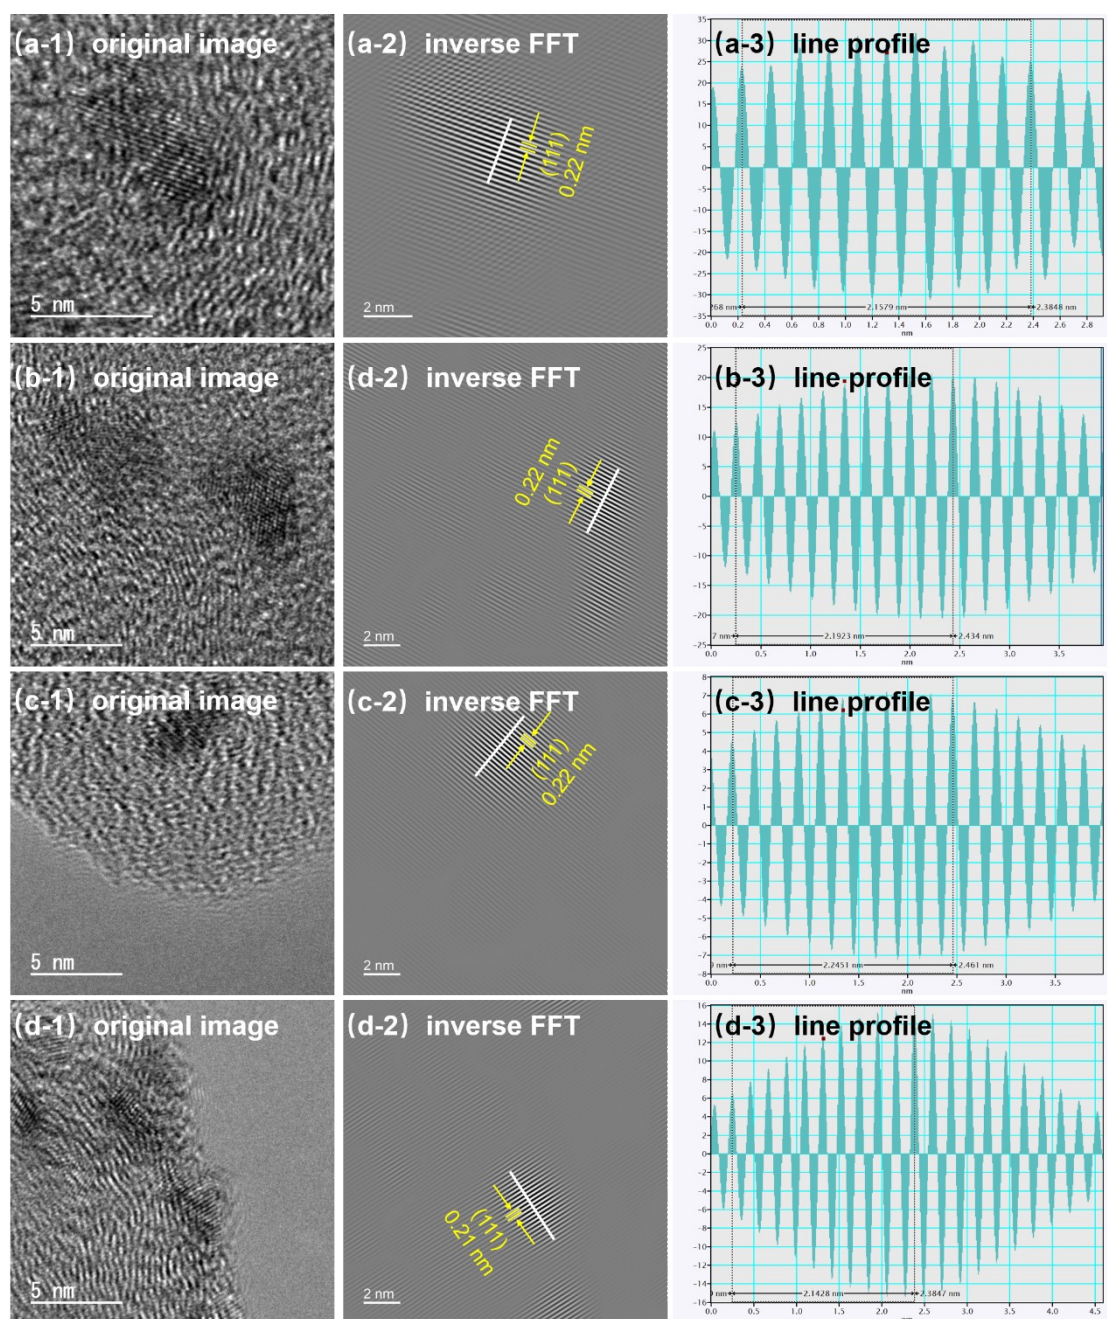

**Fig. S1.** Original TEM images of (a-1) particle-a (64:36:0), (b-1) particle-b (82:14:4), (c-1) particle-c (79:14:7) and (d-1) particle-d (79:14:7); (a-2)-(d-2) inverse Fourier Transform (FFT) masking the ring pattern of carbon on FFT, and (a-3)-(d-3) the measurement results of the lattice distance.

**Table S1.** Diffraction angles, half-maximum full width, and grain sizes obtained from 111 reflections in Fig. 2.

| Sample               | 2 $\theta$ (°) | FWHM (°) | Grain size (nm) |
|----------------------|----------------|----------|-----------------|
| 20 wt% Pt/C          | 39.70          | 1.166    | 7.24            |
| particle-a (64:36:0) | 39.83          | 0.234    | 36.2            |
| particle-b (82:14:4) | 39.83          | 0.406    | 20.8            |
| particle-c (79:14:7) | 39.91          | 0.257    | 32.9            |
| particle-d (79:14:7) | 39.80          | 0.212    | 39.9            |

FWHM: Full width at half of the peak at 2 $\theta$ .

**Table S2.** Mass activity of Particles-a to -d based on Pt+Pd+Ir weight.

|              | Particle-a | Particle-b | Particle-c | Particle-d |
|--------------|------------|------------|------------|------------|
|              | (64:36:0)  | (82:14:4)  | (79:14:7)  | (79:14:7)  |
| MA(Pt+Pd+Ir) | 133.41     | 110.61     | 164.44     | 116.46     |
| (mA/mg)      |            |            |            |            |

MA(Pt+Pd+Ir): Mass activity of Pt+Pd+Ir.
